# Supplementary material
Source: PubMed Central journal article supplement (PMC3251236)
Supplement: supp_blood-2011-08-370825_Document1.pdf [file supp_blood-2011-08-370825_Document1.pdf]

### Quantitative RT-PCR (2-gene assay)

As a companion diagnostic tool, a single-tube triplex qPCR assay was developed and optimized in a GMP format for testing a response rate in the Phase 2 patient population. Taqman-based RT-PCR assays were designed for 3 markers: *RASGRP1* (guanine nucleotide exchange factor that activates RAS), *APTX* (apratatin involved in DNA excision repair) and HMBS (used as an internal control). Sequences of Taqman primer probe sets are listed in Table 1 (Supplemental Files). JY cellular RNA (Stratagene) was used as external normalization controls. A 2-gene ratio was calculated according to the algorithm described in *Statistical Design and Analysis of Patients, Materials, and Methods* section of the article.

### Single-tube multiplexed RT-PCR in a GMP format

50ng of total RNA was used as a target input in a triplex qRT-PCR which was carried out on an Applied Biosystems Prism 7500 Sequence Detection System in a 25 $\mu$ L reaction. RNA samples (including normalization control RNAs) were thawed on ice and diluted to 10 ng/ $\mu$ l. The qRT-PCR was carried out using reagents from the Veridex BLN RT-PCR Kit (GeneSearch Breast Lymph Node (BLN) Test Kit, IVD, Cat #2900004): GeneSearch BLN Enzyme Mix, IVD, P/N 7700040 and BLN Base Master Mix, P/N 7700031. 25 $\times$  probe-primer master mix was prepared comprising: 400 nM *RASGRP1* Forward and Reverse primers and 200 nM FAM-labeled *RASGRP1*; 400 nM *APTX* Forward and Reverse primers, and 200 nM Gold 540-*APTX*, and 400 nM *HMBS* Forward and Reverse primers and 200 nM Cy5-*HMBS* (Table 1). Each reaction consisted of 9  $\mu$ L of BLN Base Master Mix, 10  $\mu$ L of 2.5 $\times$  BLN Enzyme mix and 1  $\mu$ l of 25 $\times$  primer/probe mix. 5  $\mu$ l of total RNA from patient samples or normalization controls (Universal or JY RNA) was added to 20  $\mu$ l of RT-PC master mix. The qRT-PCR assays were carried out using the following cycling parameters: 1 min at 95 $^{\circ}$ C for denaturation step; 30 minutes at 58 $^{\circ}$ C (RT reaction); 5% ramp to 70 $^{\circ}$ C and incubation for 2 min followed by 40 cycles at 95 $^{\circ}$ C for 15 seconds (denaturation) and 60 $^{\circ}$ C for 1 minute (annealing/extension).

**Table S1. Sequences of TaqMan assays used for the 2-gene assay**

| Description          | Sequence Name   | Sequence (5' to 3')                                        |
|----------------------|-----------------|------------------------------------------------------------|
| HMBS Upper primer    | HMBS_454_U19    | CCTGCCCACTGTGCTTCCT                                        |
| HMBS Lower primer    | HMBS_520_L20    | ATCATGAGGGTTTTCCCGCT                                       |
| HMBS TaqMan Probe    | HMBS_477_P24    | 5'- Quasar 670-GCTTCACCATCGGAGCCATCTGCA-BHQ2-3'            |
| RASGRP1 Upper primer | RASGPR1_287_U21 | CTGGACGATCTCATTGACAGC                                      |
| RASGRP1 Lower primer | RASGPR1_368_L22 | CTTGCAACAGTTGGTTACTTCG                                     |
| RASGRP1 TaqMan Probe | RASGPR1_310_P31 | 5'-FAM-CATTCAATCTTTTGATGCAGATGGAAACCTG-BHQ1-3'             |
| APTX Upper primer    | APTX_825_U22    | CGCTCCGATTGGGCTAC                                          |
| APTX Lower primer    | APTX_892_L22    | AGAATCAAATCCTGGCTGATC                                      |
| APTX TaqMan Probe    | APTX_846_P28    | 5'-CAL Fluor Gold 540-CACGCCATTCCGAGTATGAGCCATGTAC-BHQ1-3' |
